# Supplementary material for: Improving the cycling and air-storage stability of LiNi0.8Co0.1Mn0.1O2 through integrated surface/interface/doping engineering
Source: Royal Society of Chemistry journal article supplement (doi:10.1039/c9ta13014d), 2020-01-01
Supplement: c9ta13014d1.pdf [file c9ta13014d1.pdf]

## Supporting Information

### **Improving the Cycling and Air-Storage Stability of $\text{LiNi}_{0.8}\text{Co}_{0.1}\text{Mn}_{0.1}\text{O}_2$ through an Integrated Surface/Interface/Doping Engineering**

*Yanwu Zhai,<sup>a</sup> Wenyun Yang,<sup>b</sup> De Ning<sup>c</sup>, Jinbo Yang,<sup>b</sup> Limei Sun,<sup>d</sup> Götz Schuck<sup>c</sup>, Gerhard*

*Schumacher<sup>c</sup> and Xiangfeng Liu<sup>\*a</sup>*

<sup>a</sup> Center of Materials Science and Optoelectronics Engineering, College of Materials Science and Optoelectronic Technology, University of Chinese Academy of Sciences, Beijing 100049, China

<sup>b</sup>State Key Laboratory for Mesoscopic Physics, School of Physics, Peking University, Beijing 100871, China

<sup>c</sup>Helmholtz-Zentrum Berlin für Materialien und Energie, Hahn-Meitner-Platz 1, 14109 Berlin, Germany

<sup>d</sup>Department of Nuclear Physics, China Institute of Atomic Energy, Beijing 102413, China

\*Corresponding author: email: [liuxf@ucas.ac.cn](mailto:liuxf@ucas.ac.cn)

**Table S1.** Rietveld refinement results of lattice parameters based on XRD data and the I(003)/I(104) value for the pristine and Li<sub>2</sub>ZrO<sub>3</sub> coated samples.

| Samples      | a/(Å)     | c/(Å)      | V/(Å <sup>3</sup> ) | Z <sub>ox</sub> /(Å) | (003)/<br>(104) | R <sub>p</sub><br>(%) |
|--------------|-----------|------------|---------------------|----------------------|-----------------|-----------------------|
| Pristine NCM | 2.8688(1) | 14.1793(1) | 101.0619(10)        | 0.2419(3)            | 1.359           | 1.73                  |
| LZO@NCM      | 2.8702(1) | 14.1869(1) | 101.2128(9)         | 0.2430(2)            | 1.434           | 1.49                  |

**Table S2.** Rietveld refinement results of lattice parameters from neutron diffraction for the pristine and Li<sub>2</sub>ZrO<sub>3</sub> coated samples.

| Samples      | a/(Å)     | c/(Å)      | V/(Å <sup>3</sup> ) | R <sub>wp</sub> | R <sub>p</sub> |
|--------------|-----------|------------|---------------------|-----------------|----------------|
| Pristine NCM | 2.8704(2) | 14.193(3)  | 101.269(12)         | 8.39            | 6.49           |
| LZO@NCM      | 2.8725(1) | 14.2003(8) | 101.4713(10)        | 7.03            | 5.28           |

**Table S3.** Bond length for the pristine and Li<sub>2</sub>ZrO<sub>3</sub>-coated sample samples from Rietveld refinement results of neutron diffraction.

| Samples      | O-TM/(Å) | O-Li/(Å) | O-O/(Å) | Li-Li/(Å) | TM-Li/(Å) | R <sub>wp</sub> (%) | R <sub>p</sub> (%) |
|--------------|----------|----------|---------|-----------|-----------|---------------------|--------------------|
| Pristine NCM | 1.9660   | 2.1111   | 2.8704  | 2.8704    | 2.8882    | 8.39                | 6.49               |
| LZO@NCM      | 1.9665   | 2.1134   | 2.8725  | 2.8725    | 2.8899    | 7.03                | 5.28               |

**Table S4.** The refined crystal sites and atom occupancies of the pristine sample from the neutron diffraction data.

| <b>Atom</b> | <b>site</b> | <b>x/a</b> | <b>y/b</b> | <b>z/c</b>  | <b>Occ</b> |
|-------------|-------------|------------|------------|-------------|------------|
| Li          | 3a          | 0.0000     | 0.0000     | 0.0000      | 0.4875(19) |
| Ni          | 3a          | 0.0000     | 0.0000     | 0.0000      | 0.0121(19) |
| Ni          | 3b          | 0.0000     | 0.0000     | 0.5000      | 0.40(1)    |
| Co          | 3b          | 0.0000     | 0.0000     | 0.5000      | 0.0488     |
| Mn          | 3b          | 0.0000     | 0.0000     | 0.5000      | 0.0474     |
| Li          | 3b          | 0.0000     | 0.0000     | 0.5000      | 0.01(7)    |
| O           | 6c          | 0.0000     | 0.0000     | 0.24119(15) | 1.00000    |

**Table S5.** The refined crystal sites and atom occupancies of the  $\text{Li}_2\text{ZrO}_3$ -coated sample from the neutron diffraction data.

| <b>Atom</b> | <b>site</b> | <b>x/a</b> | <b>y/b</b> | <b>z/c</b>  | <b>Occ</b> |
|-------------|-------------|------------|------------|-------------|------------|
| Li          | 3a          | 0.0000     | 0.0000     | 0.0000      | 0.491(2)   |
| Ni          | 3a          | 0.0000     | 0.0000     | 0.0000      | 0.009(2)   |
| Ni          | 3b          | 0.0000     | 0.0000     | 0.5000      | 0.405(4)   |
| Co          | 3b          | 0.0000     | 0.0000     | 0.5000      | 0.04884    |
| Mn          | 3b          | 0.0000     | 0.0000     | 0.5000      | 0.04754    |
| Zr          | 3b          | 0.0000     | 0.0000     | 0.5000      | 0.00013    |
| Li          | 3b          | 0.0000     | 0.0000     | 0.5000      | 0.0095(4)  |
| O           | 6c          | 0.0000     | 0.0000     | 0.24108(12) | 1.00000    |

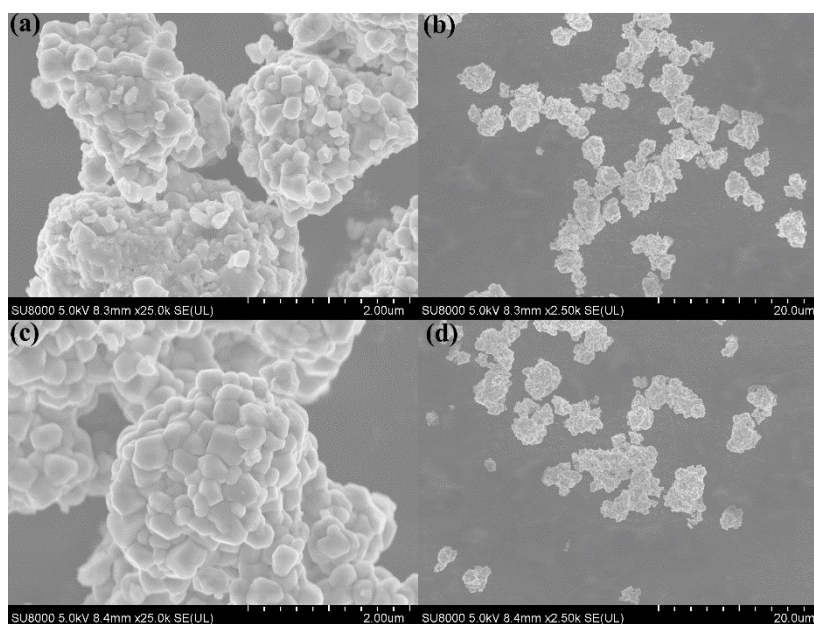

Fig S1 SEM image for pristine (a, b) and Li<sub>2</sub>ZrO<sub>3</sub>-coated NMC(c, d)

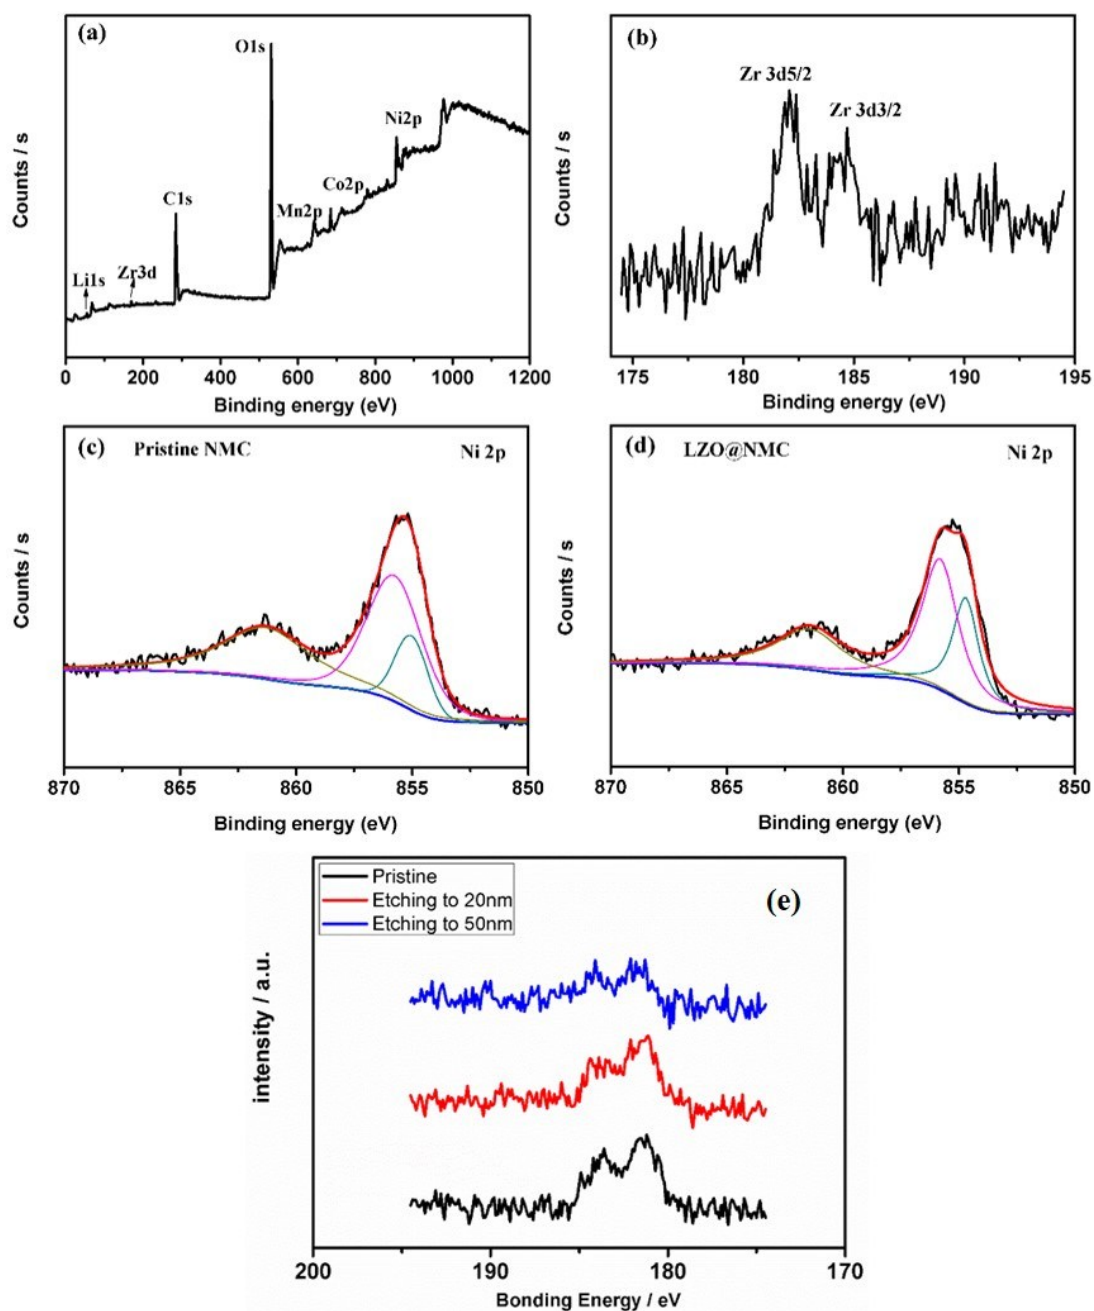

**Figure S2.** (a) XPS spectra of  $\text{Li}_2\text{ZrO}_3$  coated sample; (b) XPS spectra for Zr 3d; XPS spectra for Ni 2p of the pristine sample (c) and  $\text{Li}_2\text{ZrO}_3$  coated sample (d); XPS Zr 3d spectra collected after being etched to 0 nm, 20 nm and 50 nm for  $\text{Li}_2\text{ZrO}_3$ -coated sample.

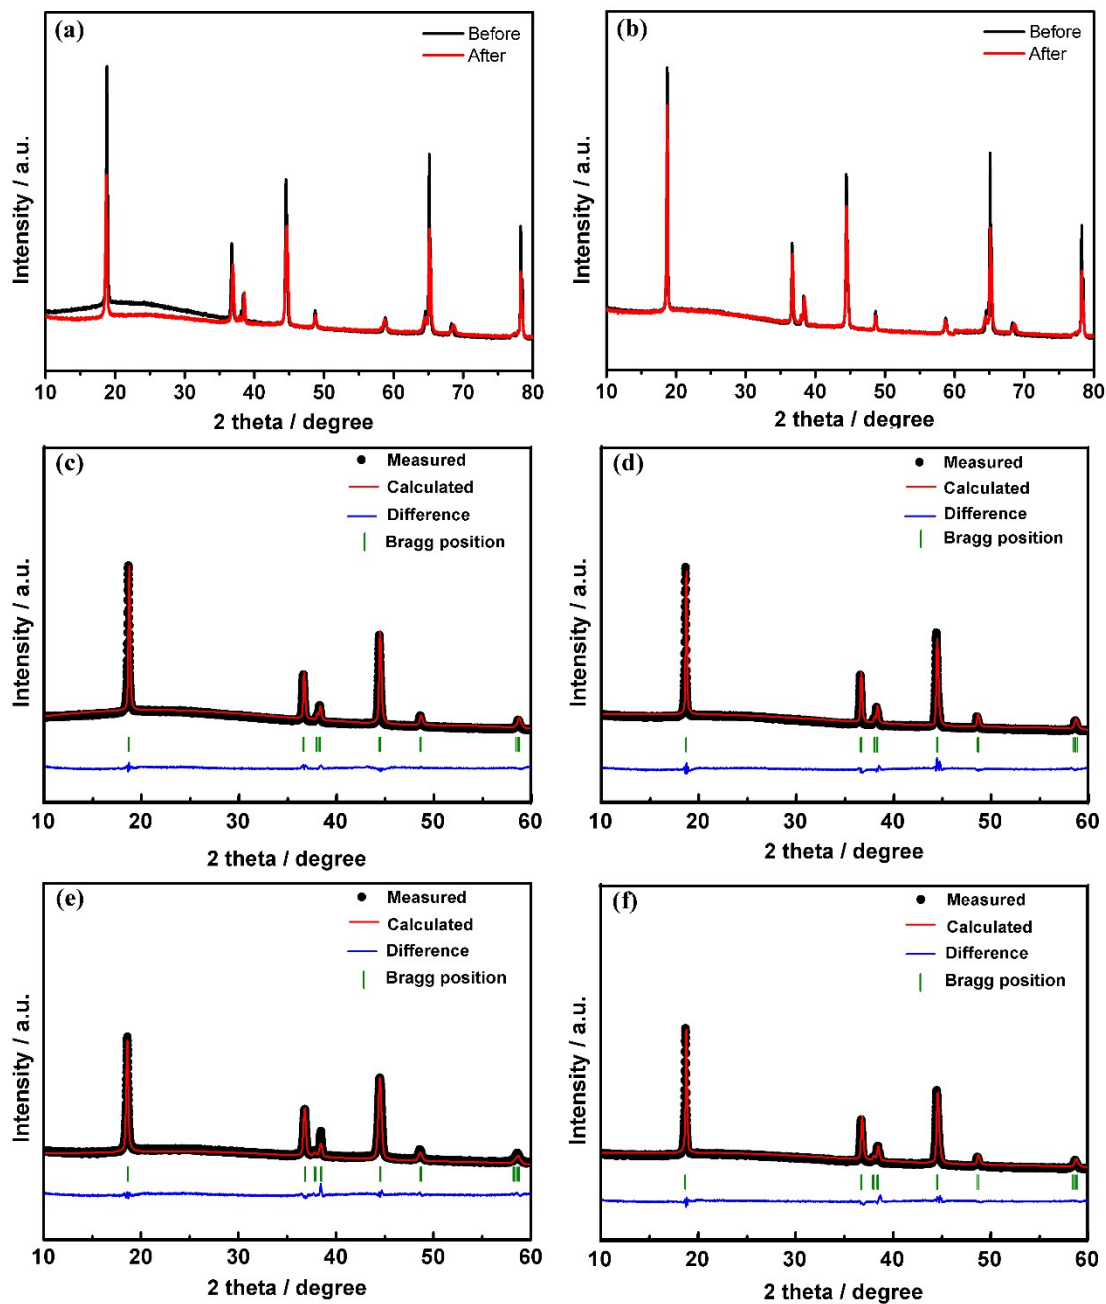

**Figure S3.** XRD patterns of the pristine sample (a) and Li<sub>2</sub>ZrO<sub>3</sub>-coated sample (b) before and after 500 cycles. Observed/calculated XRD patterns of the pristine sample (c, before cycling; e, after cycling) and Li<sub>2</sub>ZrO<sub>3</sub> coated sample (d, before cycling; f, after cycling).

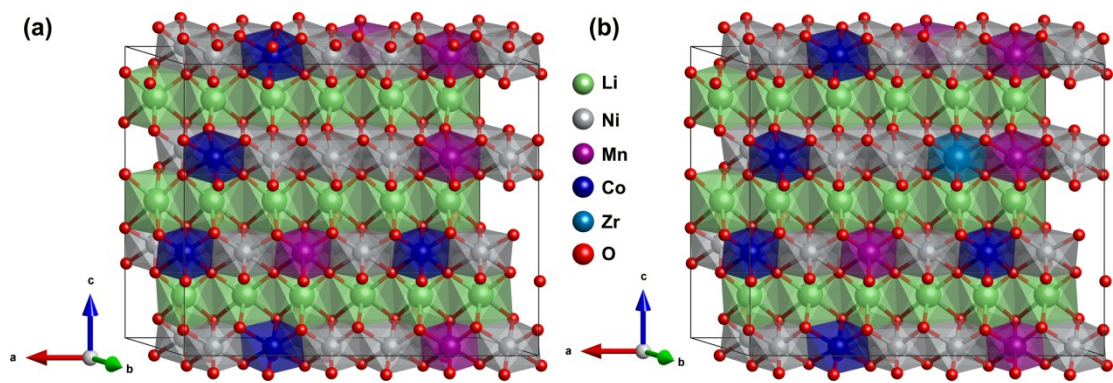

Figure.S4 The optimized structures of the pristine NMC(a) and  $\text{Li}_2\text{ZrO}_3$ -coated NMC(b)
